# Supplementary material
Source: publisher site journal article supplement (https://www.dovepress.com/article/supplementary_file/611650/611650%20Supplementary%20Material.docx)
Supplement: Supplementary file 1 [file 611650%20Supplementary%20Material.docx]

**Supplementary Table 1.** Cytotoxicity of the extracted was screening by monolayer culture system. L929 and HEK-293 cell lines were used as a normal cell line control.

| Cell lines | HM extract (μg/ml, mean ± SD) | SI index |
| --- | --- | --- |
| SiHa | 17.22 ± 3.93 | 4.65 |
| HeLa | 36.57 ± 7.26 | 2.18 |
| L929 | >80 | NA |
| HEK-293 | >80 | NA |

**Supplementary Figure 1.** The blotting analyses were performed in three independent experiments. Uncropped membranes are presented in the left panels (A, C, E), and representative blot images from these independent experiments are shown in the right panels (B, D, F).
